# Supplementary material for: CXCL8 modulates M0 macrophage proliferation and polarization to influence tumor progression in cervical cancer
Source: PubMed Central journal article supplement — Sci Rep. 2025 Jan 4;15:790. doi: 10.1038/s41598-024-81726-y (PMC11700176; doi:10.1038/s41598-024-81726-y), 2025-01-04
Supplement: 41598_2024_81726_MOESM2_ESM.pdf [file 41598_2024_81726_MOESM2_ESM.pdf]

### The first biological repeats

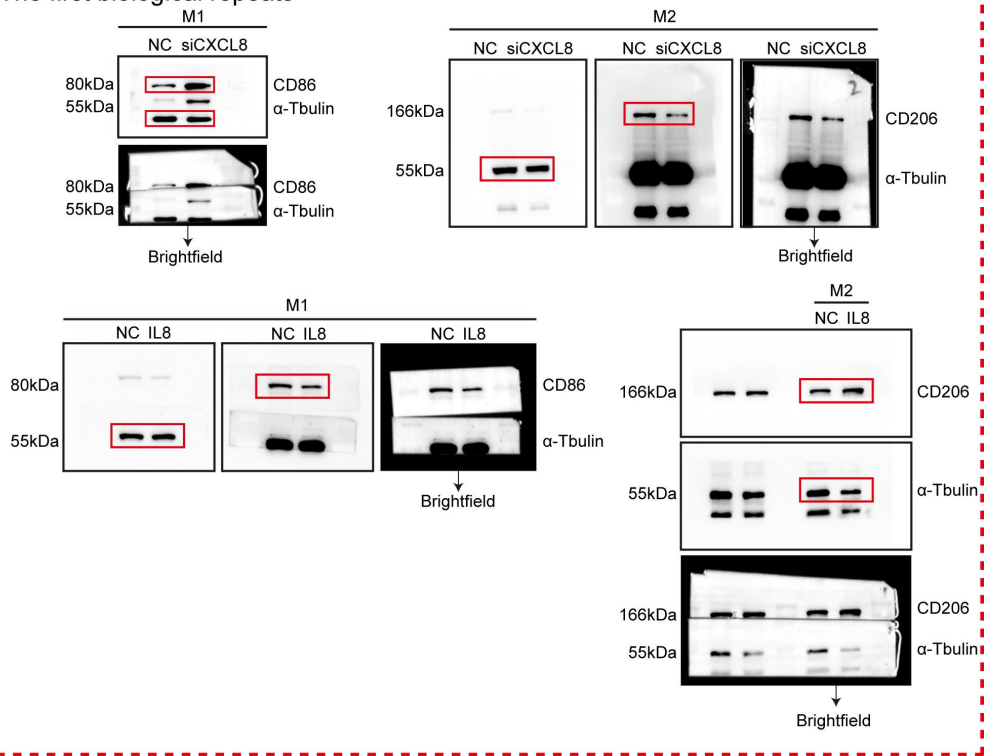

### The second biological repeats

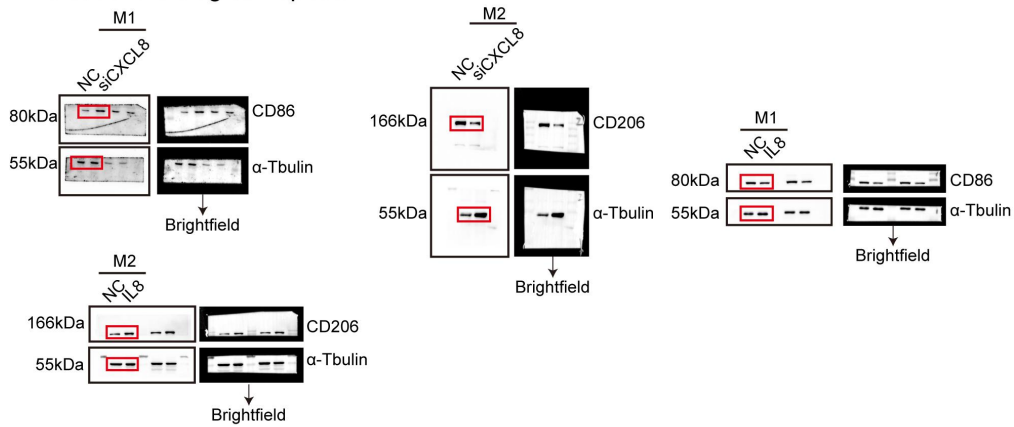

### The third biological repeats

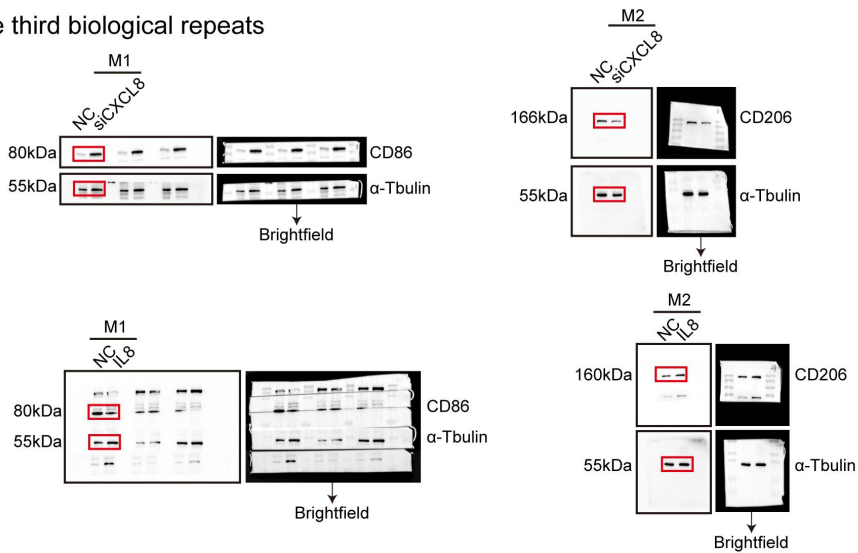

The image within the red dashed boxes represent the original images from Figure 9 in the manuscript, while the images outside the red dashed boxes correspond to the repeated experiments. The red solid boxes indicate the target bands and the internal control.
